# Supplementary material for: Towards Highly Loaded and Finely Dispersed CuO Catalysts via ADP: Effect of the Alumina Support
Source: MDPI journal article supplement (doi:10.3390/catal12060628), 2022-06-08
Supplement: s1 [file s1]

# Supplementary information

## Towards highly loaded and finely dispersed CuO catalysts via ADP: Effect of the alumina support

Tim Van Everbroeck<sup>a</sup>, Aggeliki Papavasiliou<sup>b,\*</sup>, Radu-George Ciocarlan<sup>a</sup>, Evangelos Poulakis<sup>c</sup>, Constantine J. Philippopoulos<sup>c</sup>, Erika O. Jardim<sup>d</sup>, Joaquin Silvestre-Albero<sup>d</sup>, Pegie Cool<sup>a</sup>, Fotis K. Katsaros<sup>b</sup>

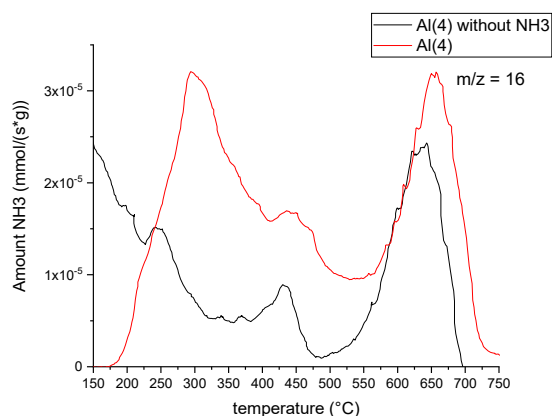

Figure S1: NH<sub>3</sub>-TPD and TPD after cleaning with He for 2 hours

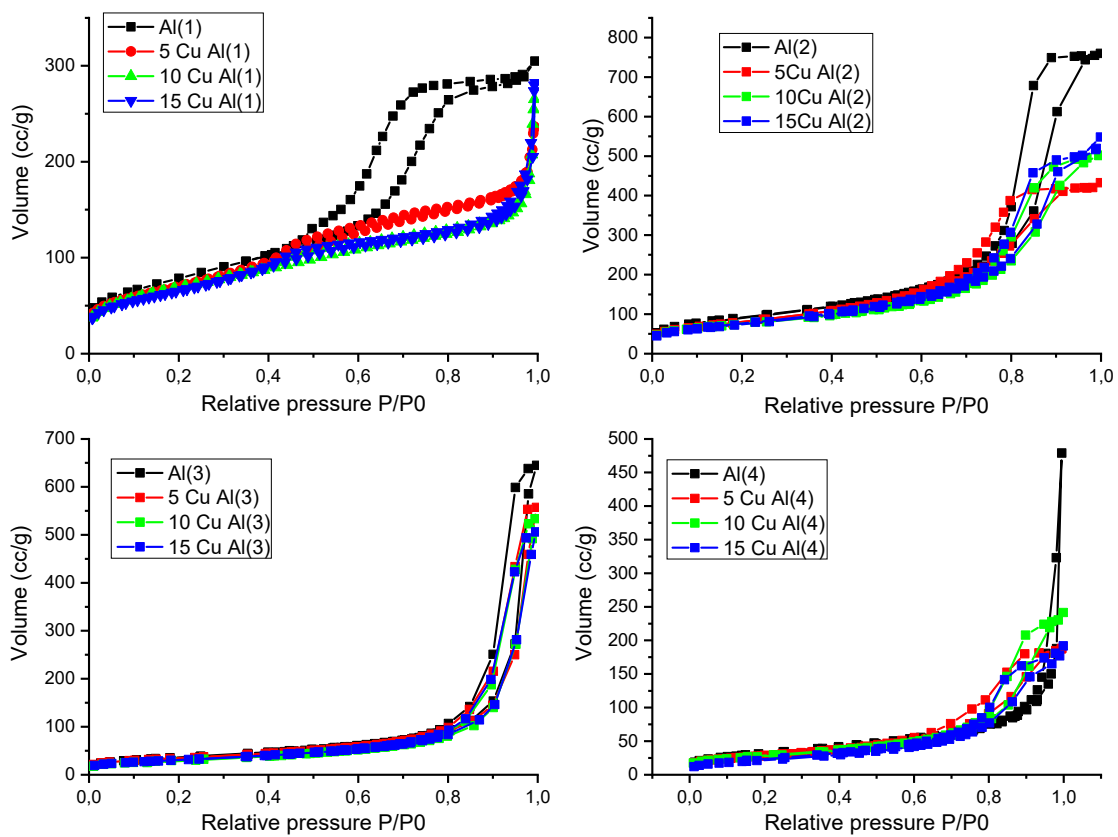

Figure S2: N<sub>2</sub>-physorption isotherms. Top left: Al(1) and derived materials loaded with CuO, top right: Al(2) and derived materials loaded with CuO, bottom left: Al(3) and derived materials loaded with CuO, bottom right: Al(4) and derived materials loaded with CuO

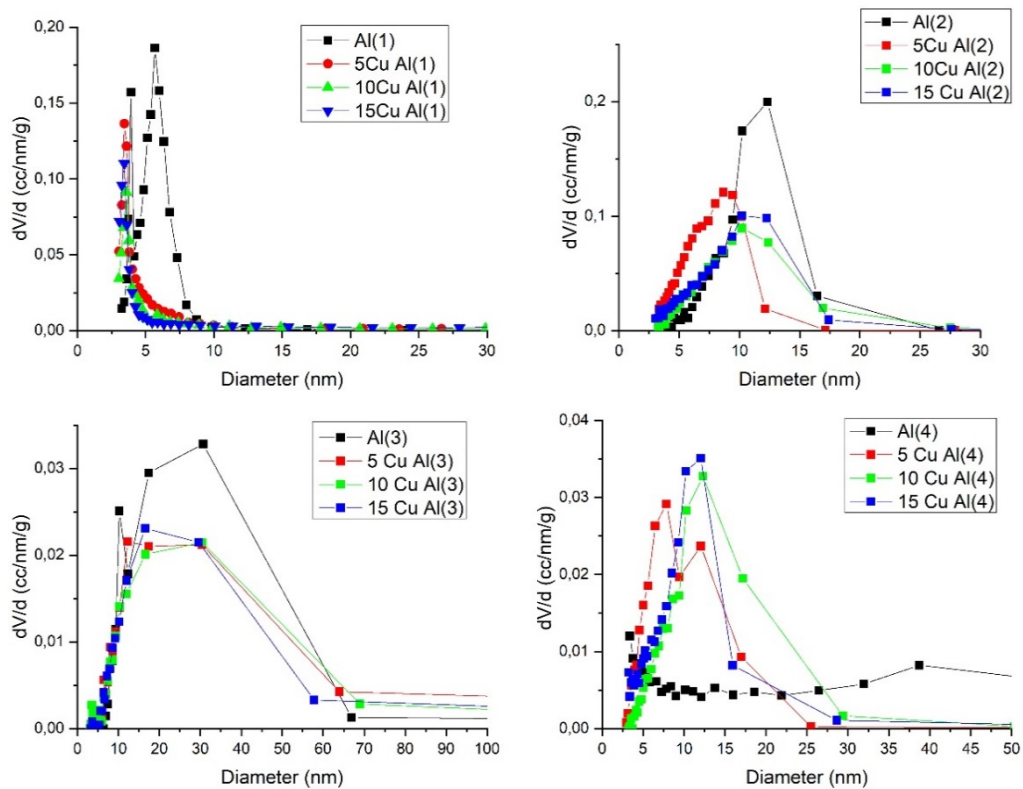

Figure S3: Pore-size distributions (PSD) derived from the desorption branch. Top left: Al(1) and derived materials loaded with CuO, top right: Al(2) and derived materials loaded with CuO, bottom left: Al(3) and derived materials loaded with CuO, bottom right: Al(4) and derived materials loaded with CuO

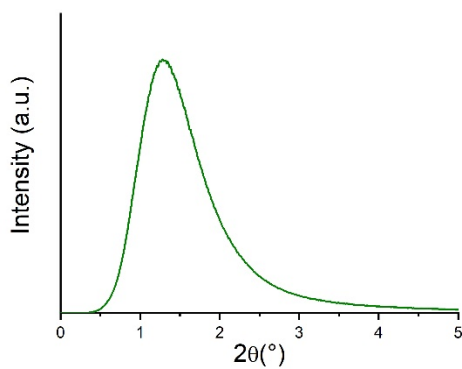

Figure S4: Low angle XRD pattern of 5 Cu Al(1)

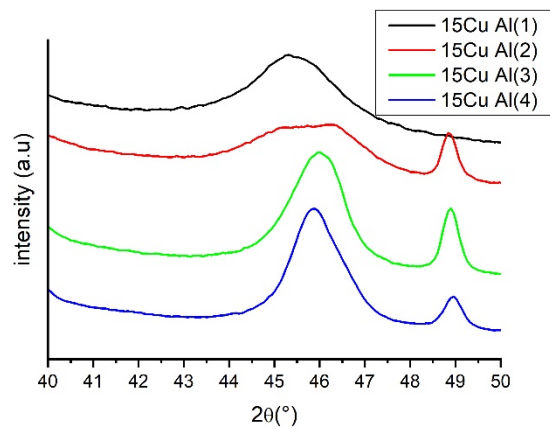

Figure S5: Detail of the XRD patterns of the 15 wt% Cu loaded alumina samples

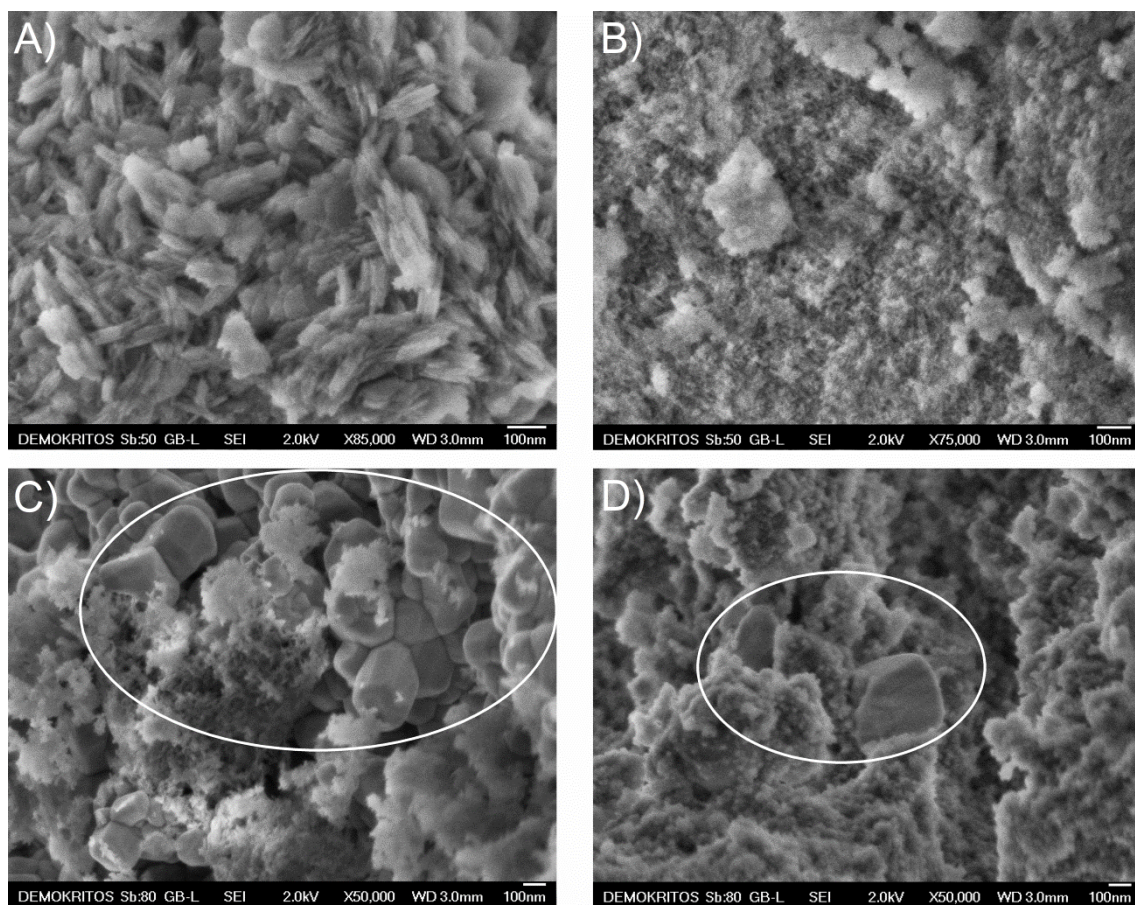

Figure S6: SEM micrographs of A) 10Cu Al(1), B) 10Cu Al(2), C) 10Cu Al(3) and D) 10Cu Al(4) samples

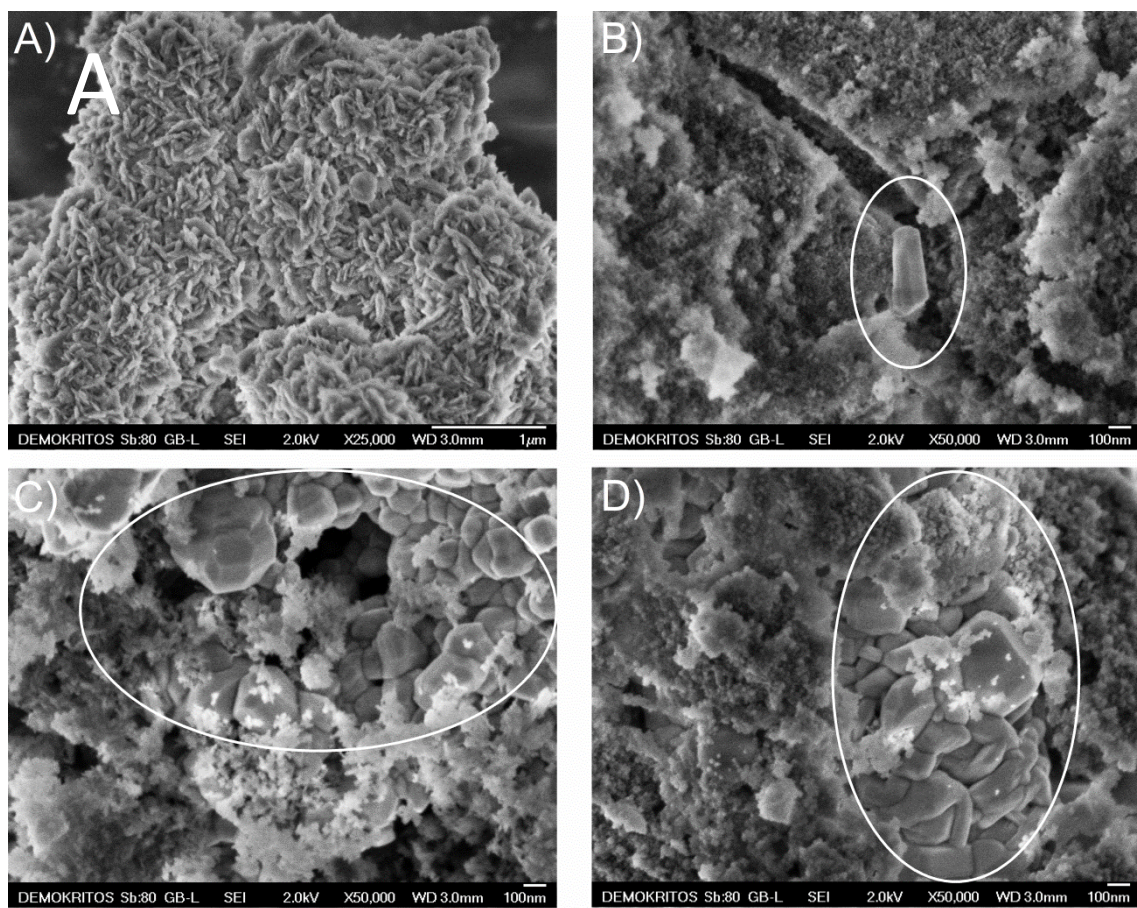

Figure S7: SEM micrographs of A) 15CuAl(1), B) 15CuAl(2), C) 15CuAl(3) and D) 15CuAl(4) samples

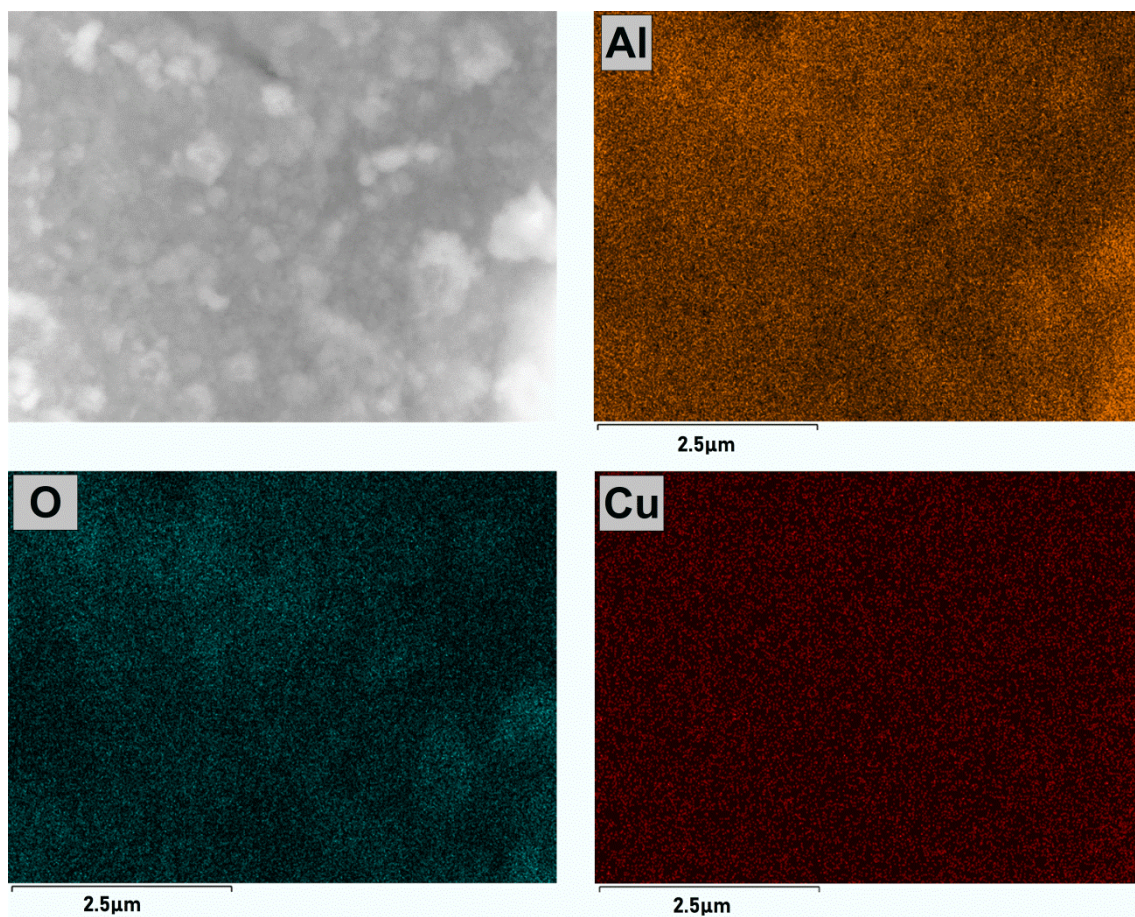

Figure S8: SEM micrograph of 5CuAl(1) sample and the corresponding O, Cu, Al elemental maps

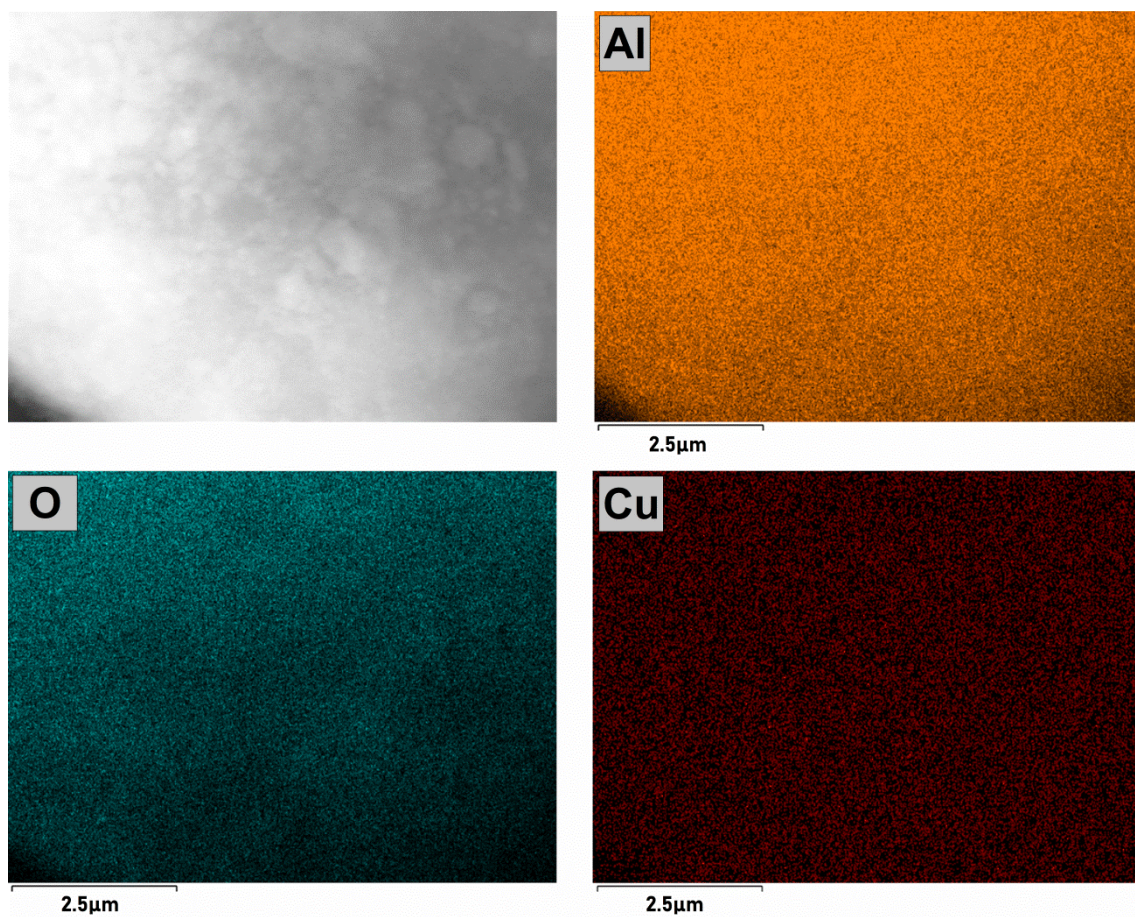

Figure S9: SEM micrograph of 5CuAl(2) sample and the corresponding O, Cu, Al elemental maps

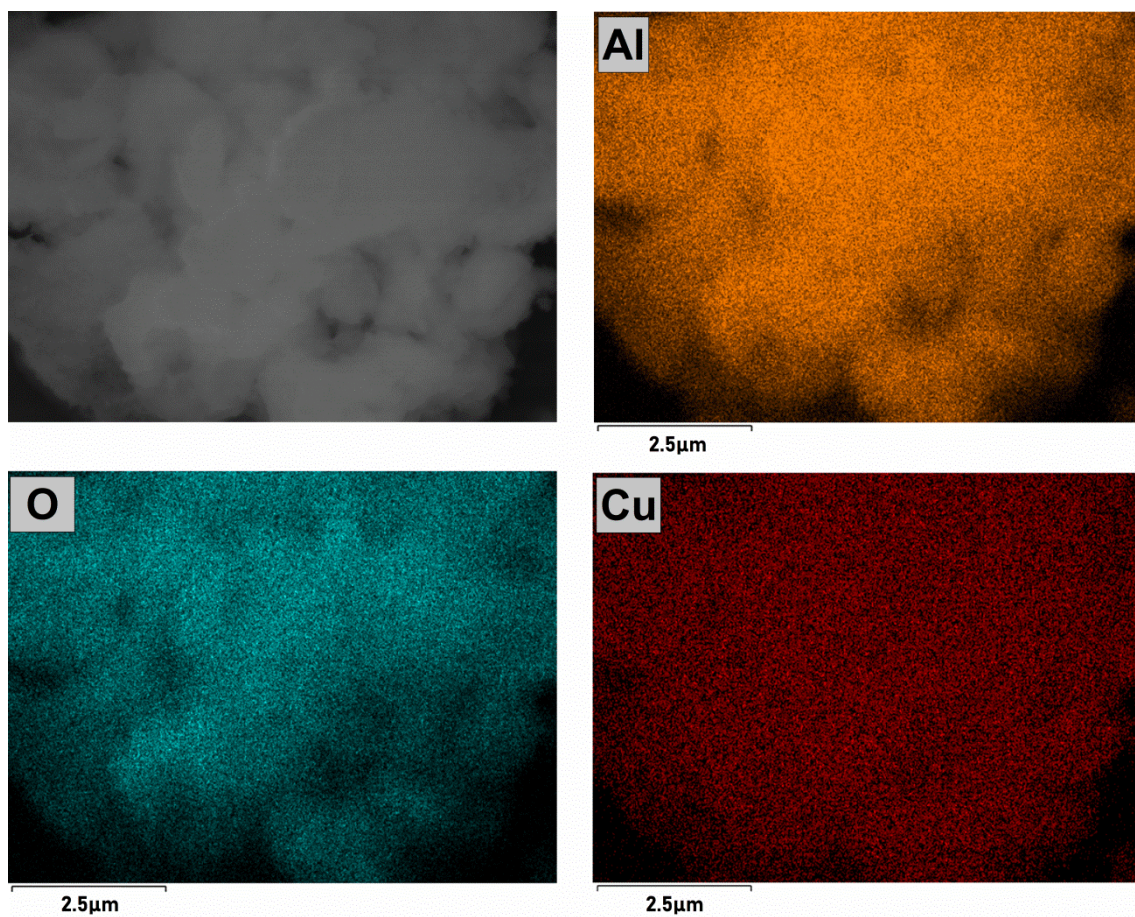

*Figure S10: SEM micrograph of 15CuAl(1) sample and the corresponding O, Cu, Al elemental maps*

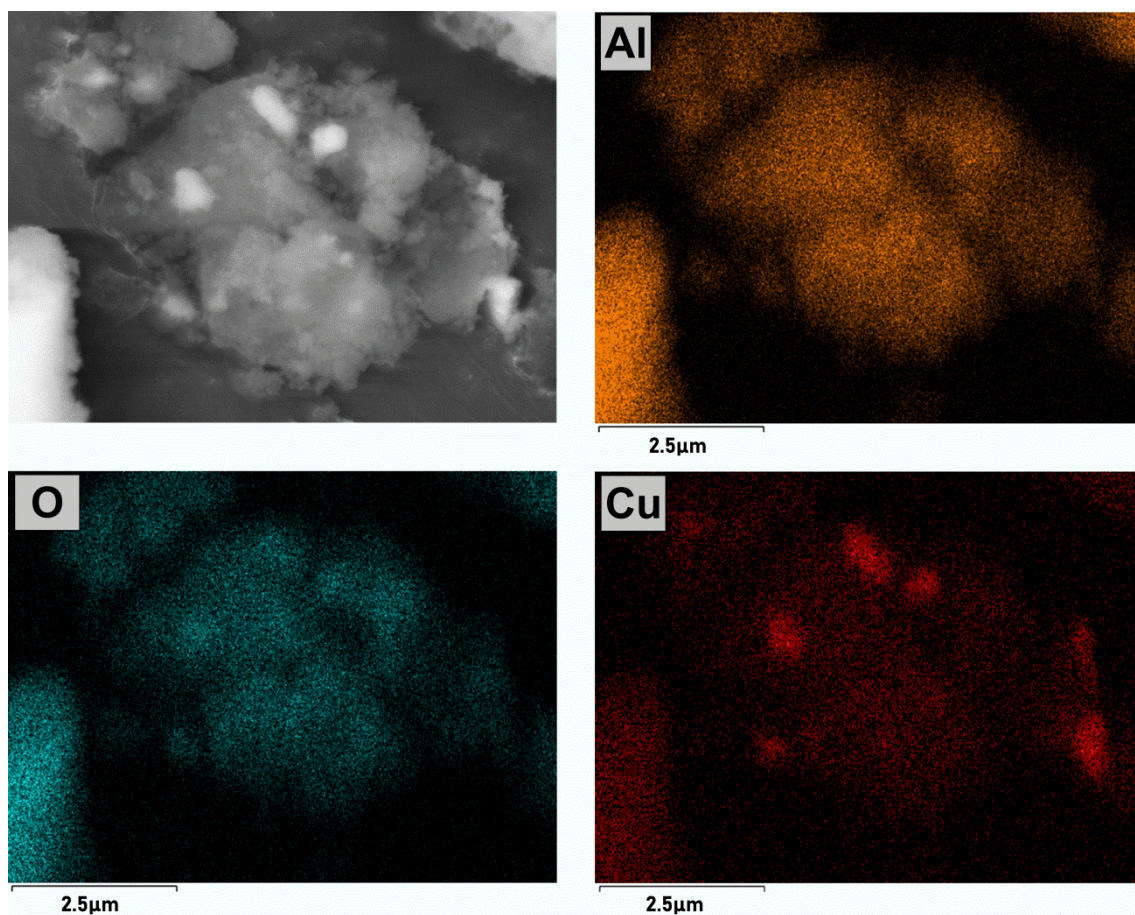

Figure S11: SEM micrograph of 15CuAl(2) sample and the corresponding O, Cu, Al elemental maps

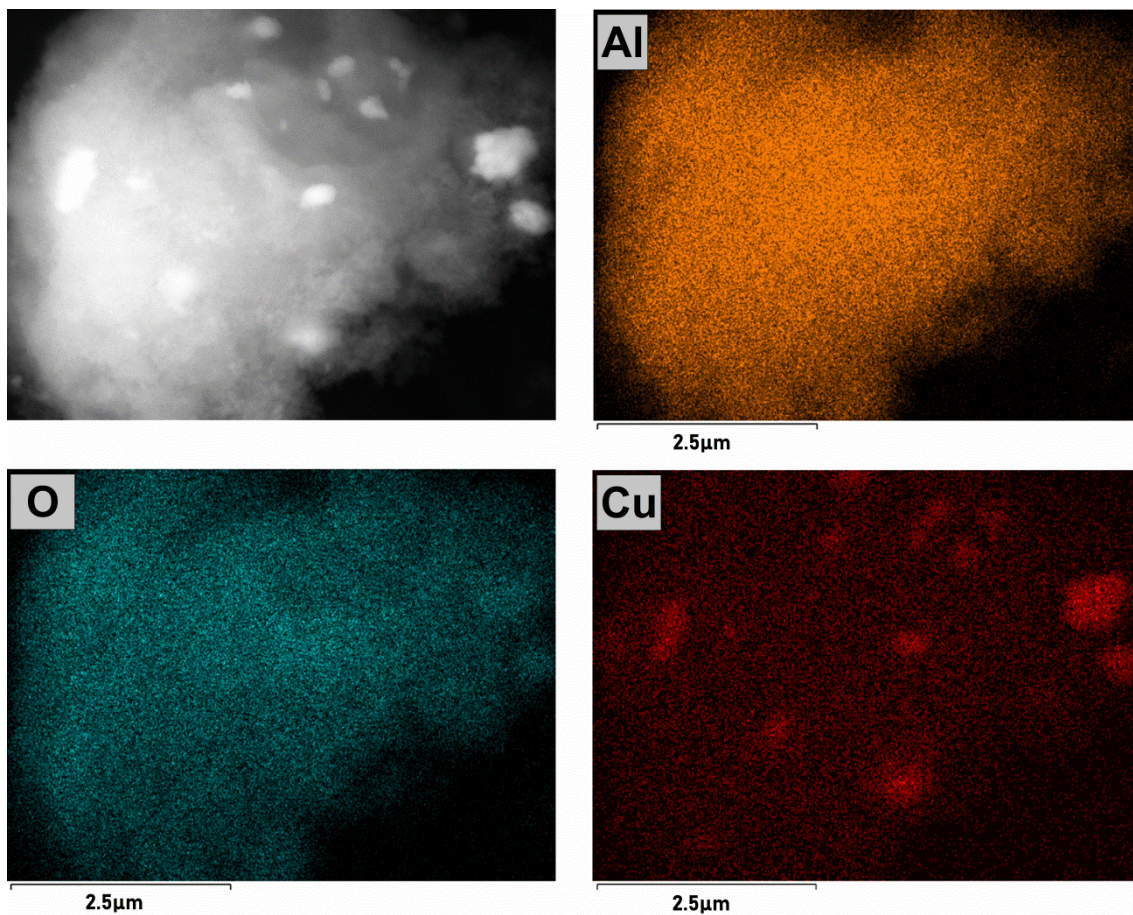

Figure S12: SEM micrograph of 15CuAl(3) sample and the corresponding O, Cu, Al elemental maps

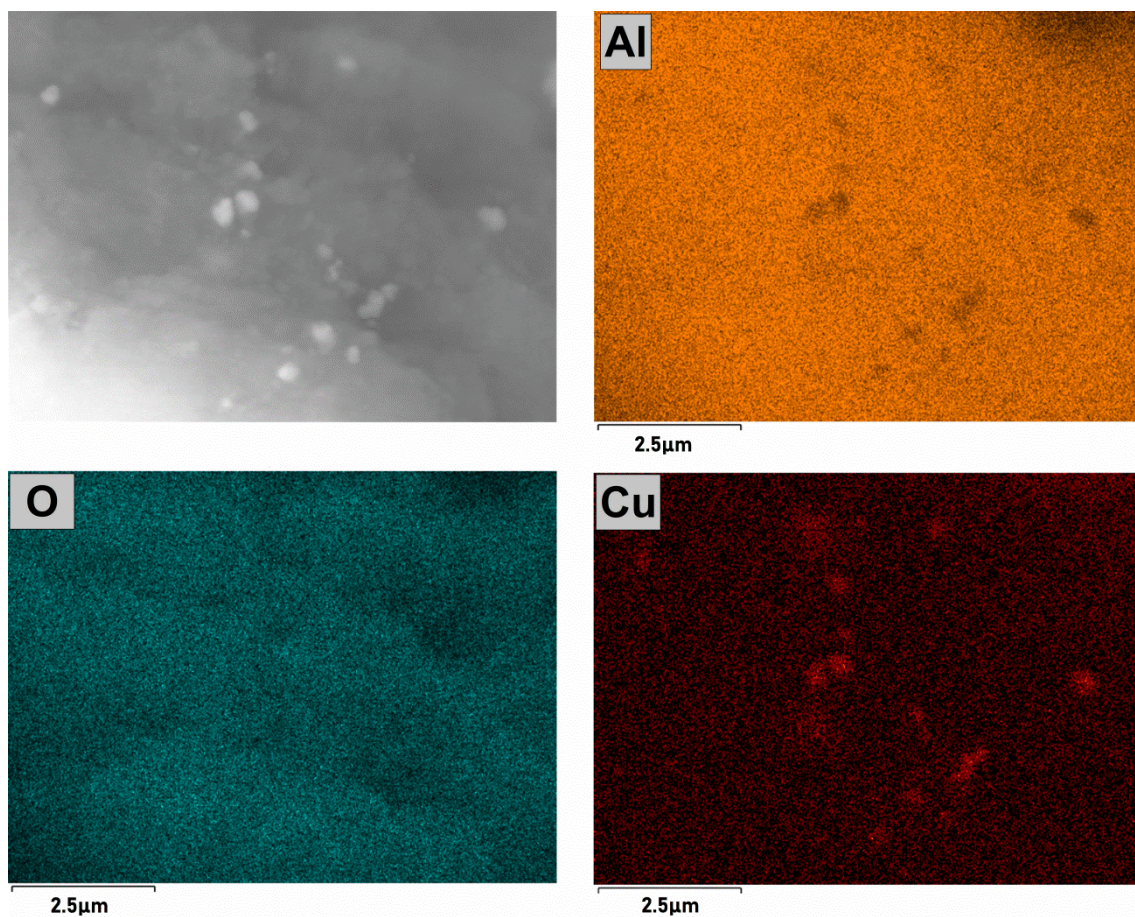

Figure S13: SEM micrograph of 15CuAl(4) sample and the corresponding O, Cu, Al elemental maps

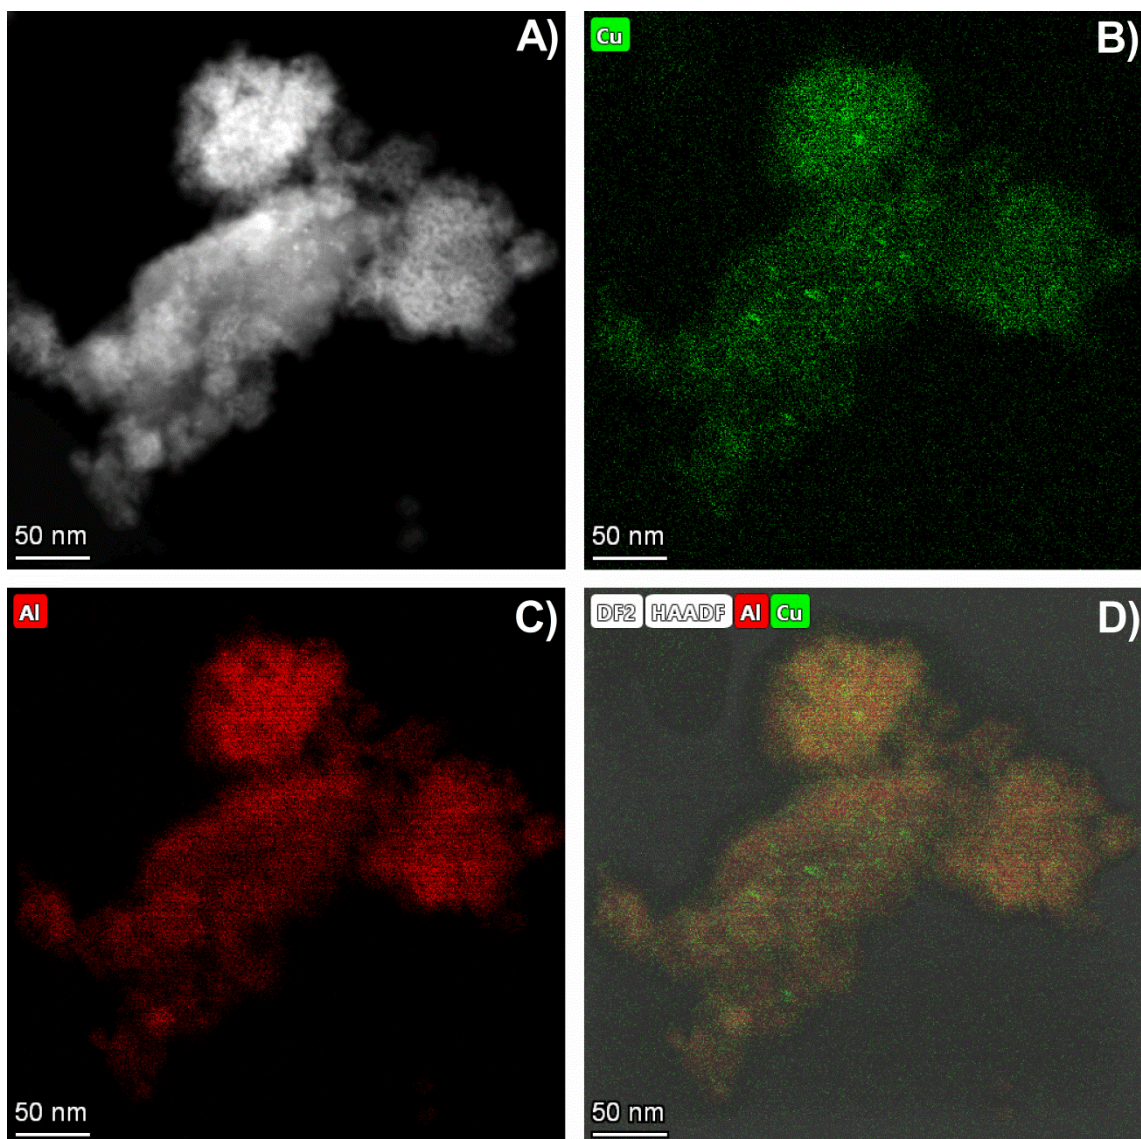

Figure S14: A) HAADF STEM image and B-D) EDS mapping images of 5CuAl(1) sample

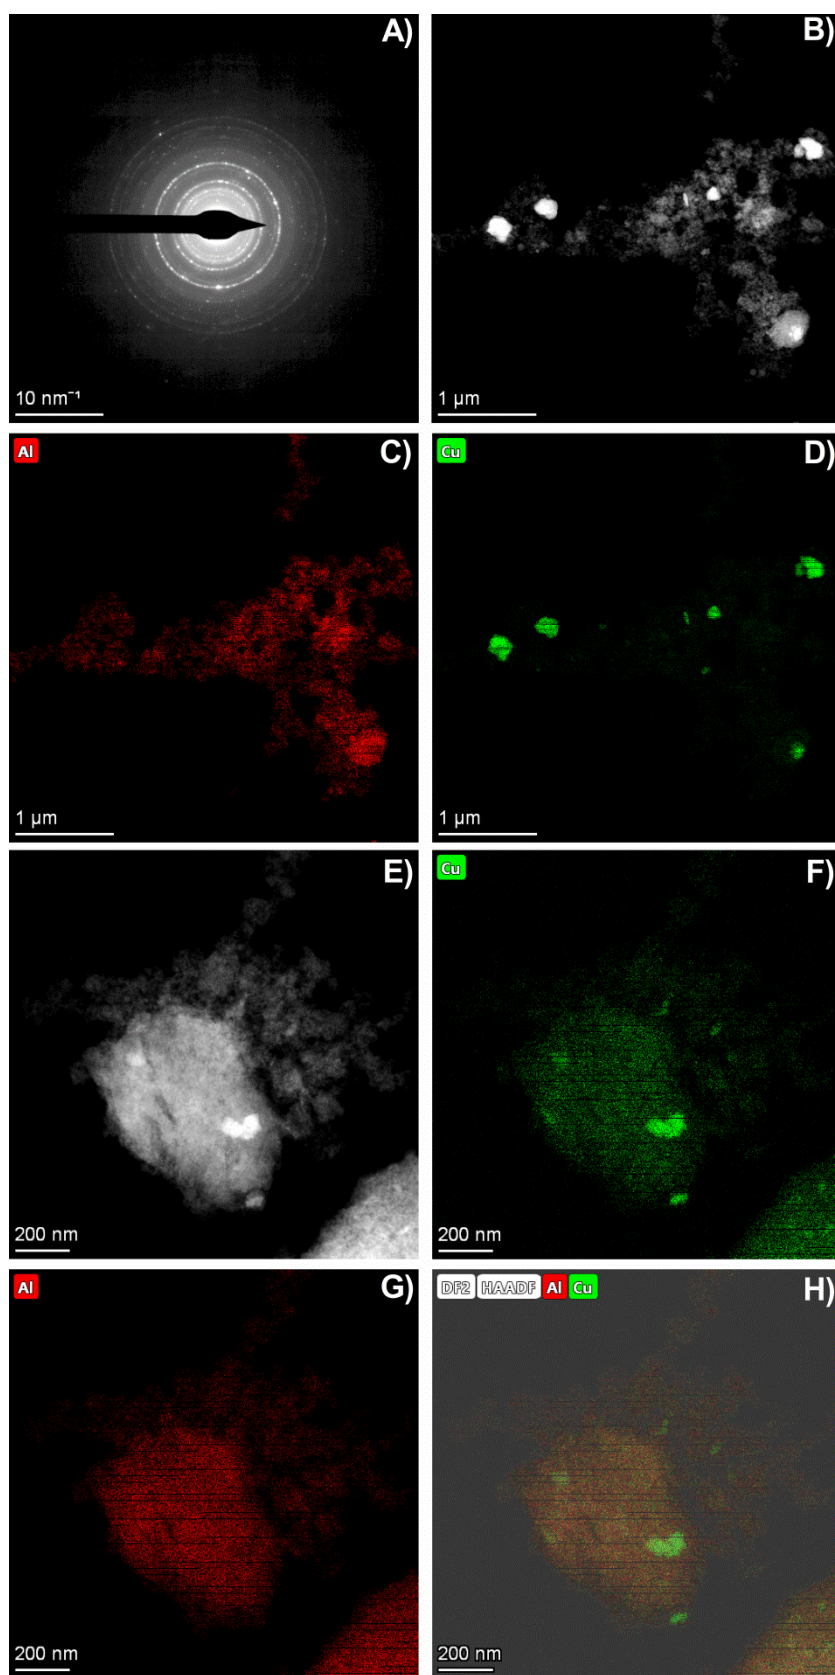

Figure S15: A) SAED pattern, B) HAADF STEM image, C-D) EDS mapping images of  $15\text{CuAl}(4)$  sample, E) HAADF STEM image and F-H) EDS mapping images of  $15\text{CuAl}(2)$  sample

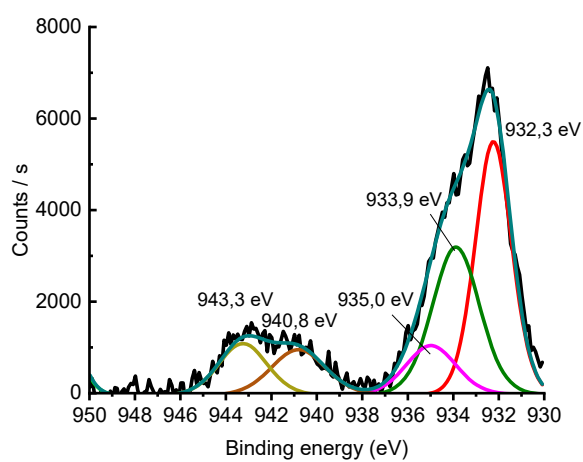

Figure S16: XPS characterisation of the Cu 2p<sub>3/2</sub> transition for 5 Cu Al(1) sample

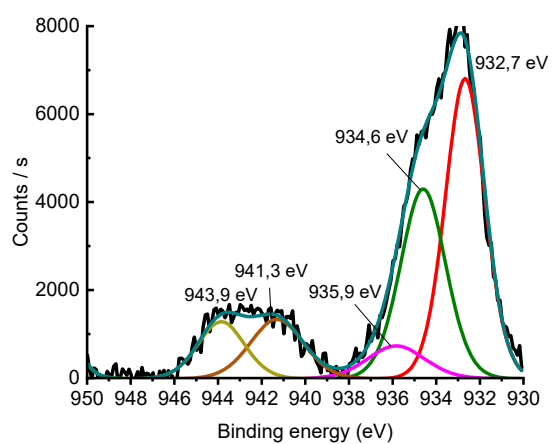

Figure S17: XPS characterization of the Cu 2p<sub>3/2</sub> transition for 5 Cu Al(2) sample

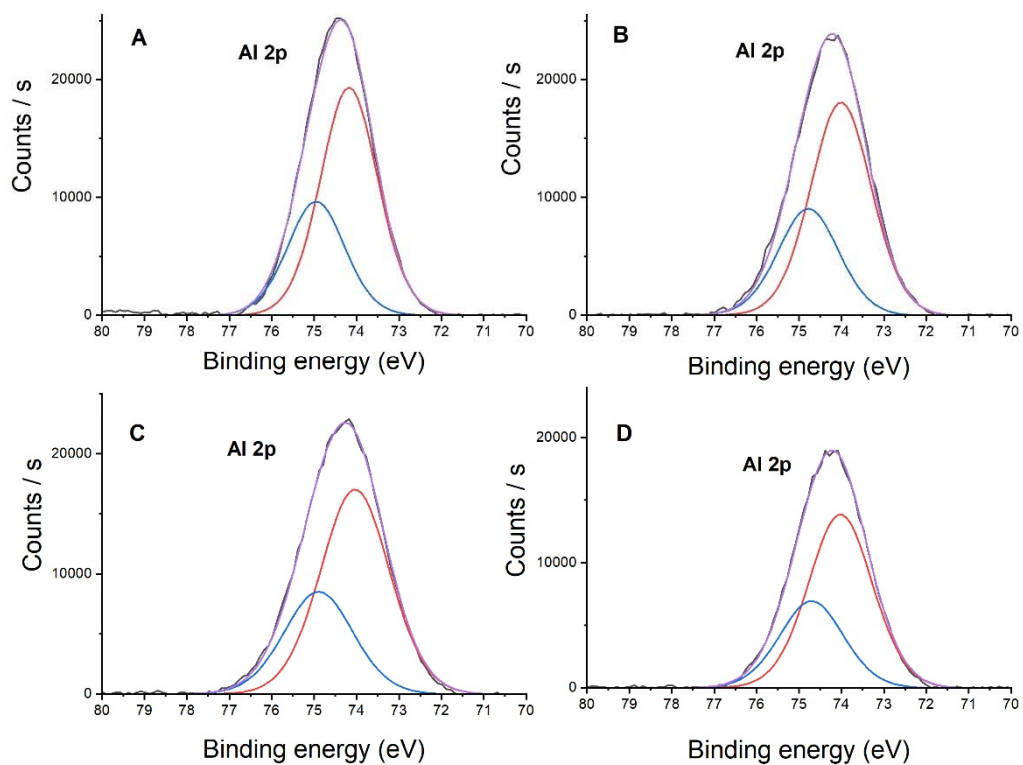

Figure S18: XPS characterization of the Al 2p transition for A) 15 Cu Al(1) B) 15 Cu Al(2) C) 15 Cu Al(3) D) 15 Cu Al(4)

The Al 2p transitions of the 15 wt% Cu loaded samples are shown in the supplementary information (Figure S 8). The Al 2p transition in  $\gamma$ -Al<sub>2</sub>O<sub>3</sub> is reported to be at 73.5 eV [1], while for CuAl<sub>2</sub>O<sub>4</sub> it is reported at 74.5 eV[2]. The Al2p XP spectra are rather similar for the four samples evaluated. For all catalysts there is a broad contribution at around 74.2-74.4 eV that can be deconvoluted in two peaks centered at 74.1 eV due to Al2p<sub>3/2</sub> and 75.0 eV due to Al2p<sub>1/2</sub>. The shift in the binding energy of the Al2p contribution to higher values compared to  $\gamma$ -Al<sub>2</sub>O<sub>3</sub> (73.5 eV) could be related either to CuAl<sub>2</sub>O<sub>4</sub> spinel formation [1], or to the large number of alumina surface defect sites strongly interacting with CuO species[3].

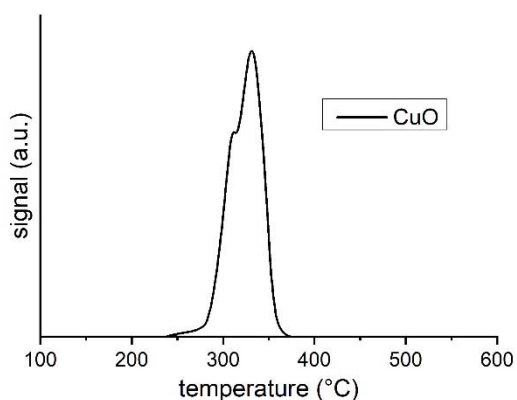

Figure S19: H<sub>2</sub>-TPR profile of CuO

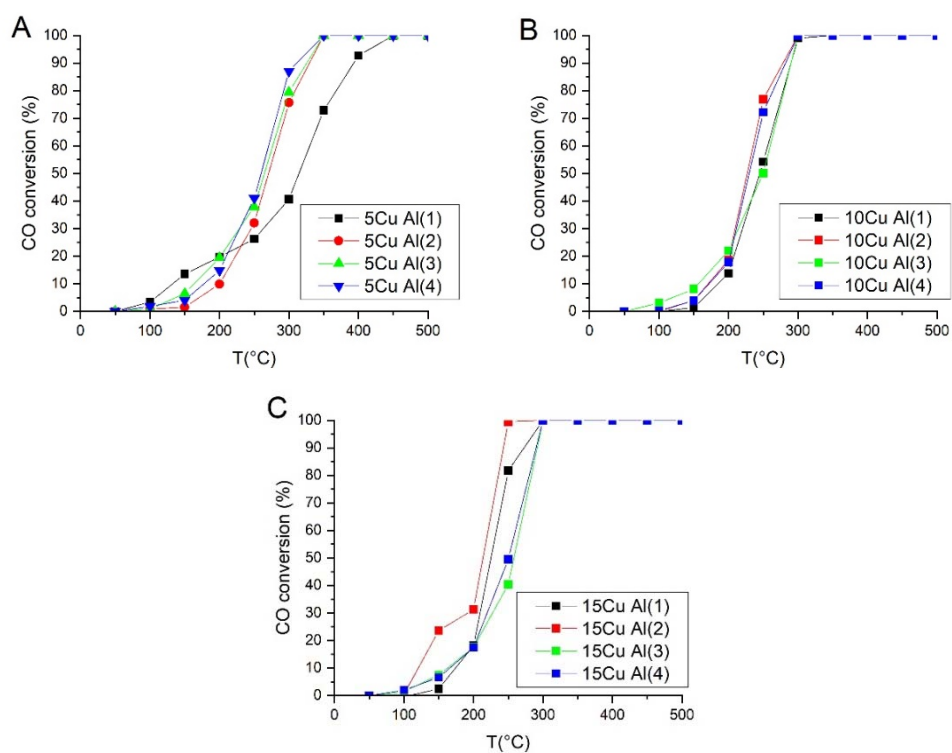

Figure S20: CO conversion profiles vs. temperature A) 5 wt% Cu loaded samples B) 10 wt% Cu loaded samples C) 15 wt% Cu loaded samples

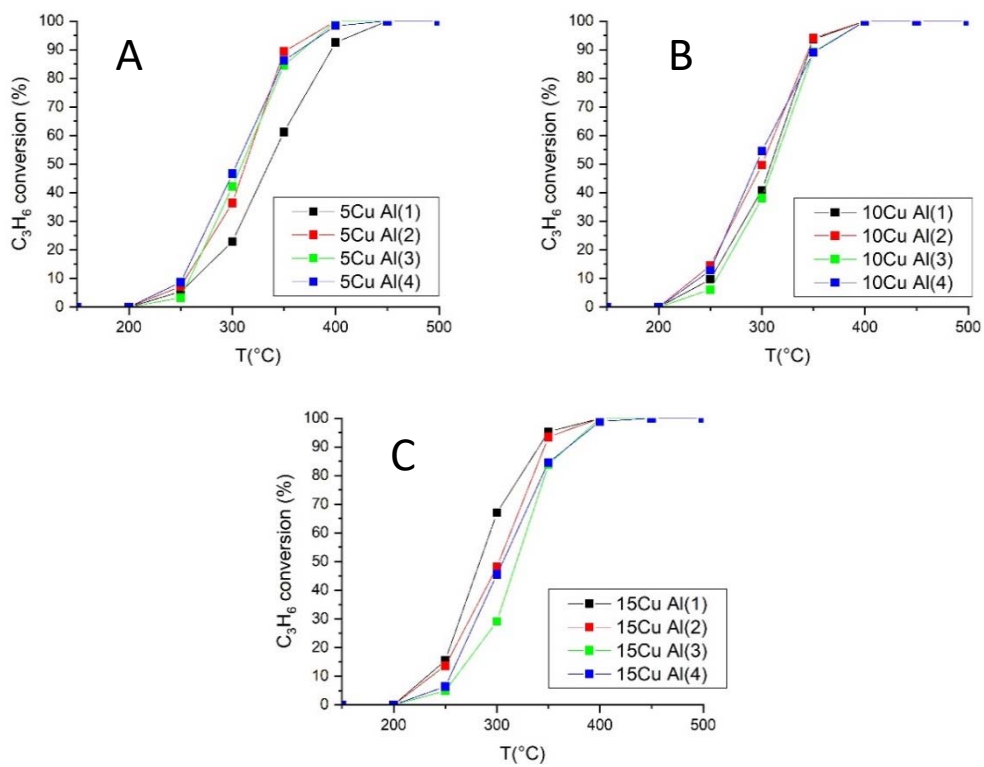

Figure S21:  $C_3H_6$  conversion profiles vs. temperature A) 5 wt% Cu loaded samples B) 10 wt% Cu loaded samples C) 15

wt% Cu loaded samples

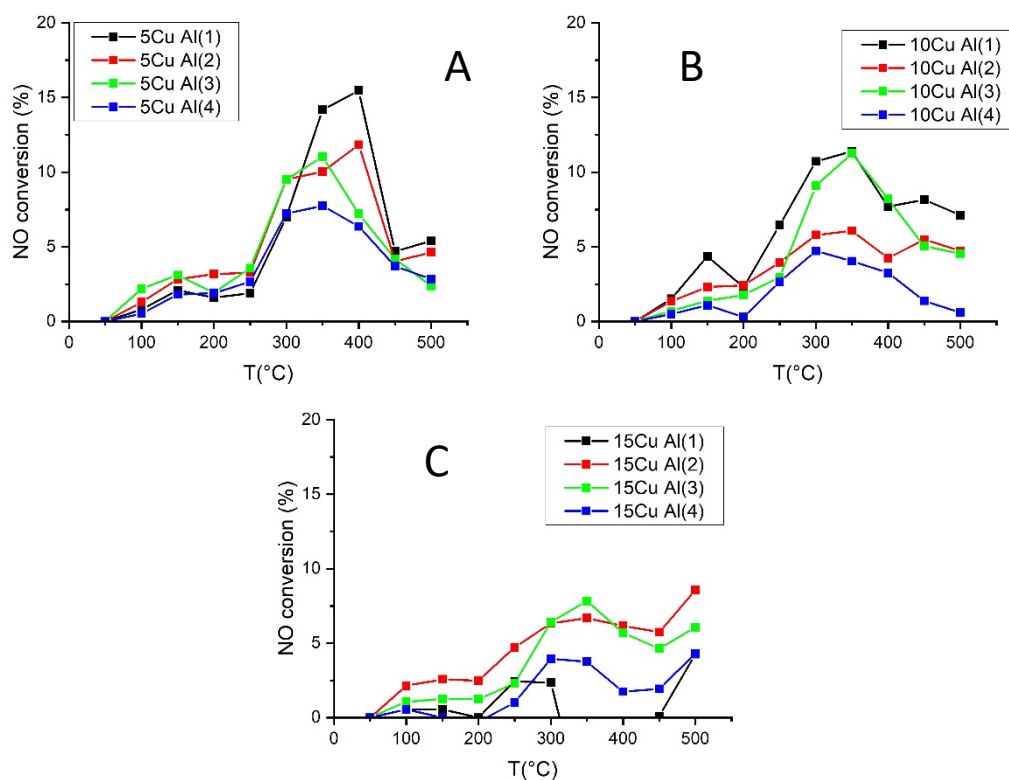

Figure S22: NO conversion profiles vs. temperature A) 5 wt% Cu loaded samples B) 10 wt% Cu loaded samples C) 15

wt% Cu loaded samples

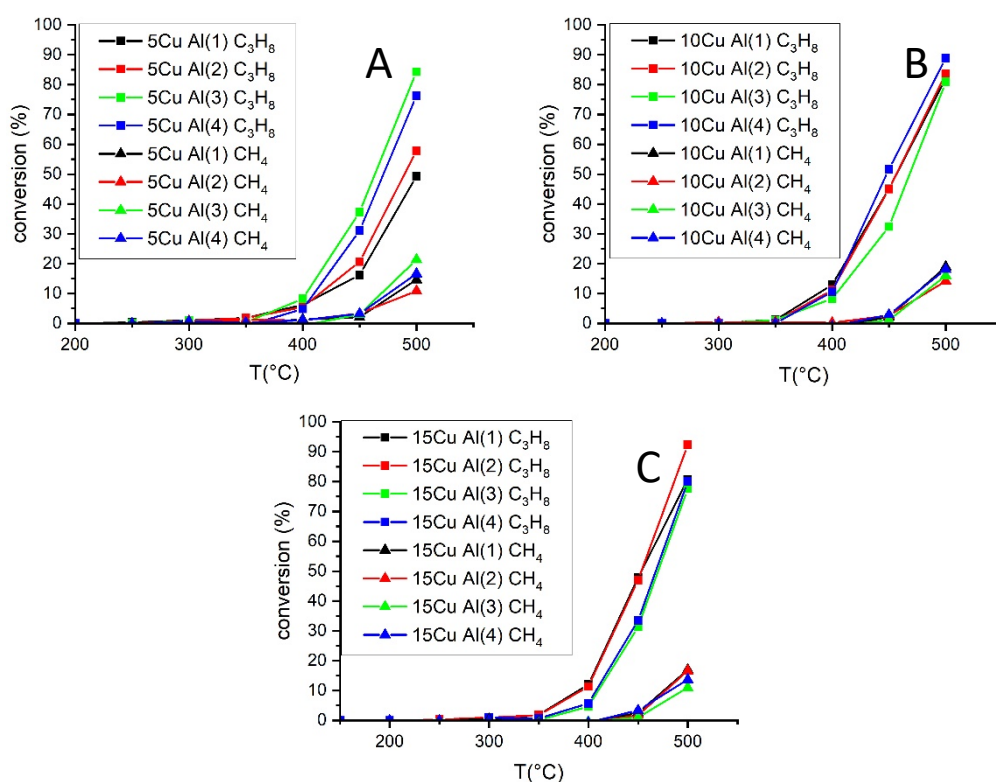

Figure S23:  $C_3H_8$  and  $CH_4$  conversion profiles vs. temperature A) 5 wt% Cu loaded samples B) 10 wt% Cu loaded samples C) 15 wt% Cu loaded samples

|           |                       | NO   | CO  | $C_3H_6$ | $C_3H_8$ | $CH_4$ |
|-----------|-----------------------|------|-----|----------|----------|--------|
| 5Cu Al(1) | $T_{50}$ (°C)         | -    | 314 | 335      | -        | -      |
|           | $T_{90}/T_{max}$ (°C) | 400  | 393 | 396      | 500      | 500    |
|           | Max. conv.(%)         | 15.5 | 100 | 100      | 49.4     | 14.6   |
| 5Cu Al(2) | $T_{50}$ (°C)         | -    | 271 | 313      | 489      | -      |
|           | $T_{90}/T_{max}$ (°C) | 400  | 329 | 353      | 500      | 500    |
|           | Max. conv.(%)         | 11.8 | 100 | 100      | 57.9     | 10.9   |
| 5Cu Al(3) | $T_{50}$ (°C)         | -    | 265 | 309      | 464      | -      |
|           |                       |      |     |          |          |        |
|           |                       |      |     |          |          |        |

|            |                        |      |     |     |      |      |
|------------|------------------------|------|-----|-----|------|------|
| 5Cu Al(4)  | $T_{90}/T_{\max}$ (°C) | 350  | 326 | 368 | 500  | 500  |
|            | Max. conv.(%)          | 11   | 100 | 100 | 84.3 | 21.4 |
|            | $T_{50}$ (°C)          | -    | 260 | 304 | 471  | -    |
|            | $T_{90}/T_{\max}$ (°C) | 350  | 311 | 366 | 500  | 500  |
|            | Max. conv.(%)          | 7.7  | 100 | 100 | 76.3 | 16.6 |
| <hr/>      |                        |      |     |     |      |      |
| 10Cu Al(1) | $T_{50}$ (°C)          | -    | 245 | 309 | 457  | -    |
|            | $T_{90}/T_{\max}$ (°C) | 350  | 290 | 347 | 500  | 500  |
|            | Max. conv.(%)          | 11.4 | 100 | 100 | 82.1 | 18.9 |
| 10Cu Al(2) | $T_{50}$ (°C)          | -    | 227 | 300 | 457  | -    |
|            | $T_{90}/T_{\max}$ (°C) | 350  | 278 | 345 | 500  | 500  |
|            | Max. conv.(%)          | 6.1  | 100 | 100 | 83.7 | 14.2 |
| 10Cu Al(3) | $T_{50}$ (°C)          | -    | 250 | 312 | 468  | -    |
|            | $T_{90}/T_{\max}$ (°C) | 350  | 290 | 354 | 500  | 500  |
|            | Max. conv.(%)          | 11.3 | 100 | 100 | 80.9 | 16   |
| 10Cu Al(4) | $T_{50}$ (°C)          | -    | 230 | 295 | 448  | -    |
|            | $T_{90}/T_{\max}$ (°C) | 300  | 282 | 355 | 500  | 500  |
|            | Max. conv.(%)          | 4.7  | 100 | 100 | 88.9 | 18.1 |
| <hr/>      |                        |      |     |     |      |      |
| 15Cu Al(1) | $T_{50}$ (°C)          | -    | 225 | 283 | 453  | -    |
|            | $T_{90}/T_{\max}$ (°C) | 500  | 273 | 341 | 500  | 500  |
|            | Max. conv.(%)          | 4.2  | 100 | 100 | 80.8 | 17   |
| 15Cu Al(2) | $T_{50}$ (°C)          | -    | 213 | 302 | 453  | -    |
|            | $T_{90}/T_{\max}$ (°C) | 500  | 243 | 346 | 500  | 500  |
|            | Max. conv.(%)          | 8.6  | 100 | 100 | 92.4 | 16.6 |
| 15Cu Al(3) | $T_{50}$ (°C)          | -    | 258 | 319 | 470  | -    |

|            |                       |     |     |     |      |      |
|------------|-----------------------|-----|-----|-----|------|------|
| 15Cu Al(4) | $T_{90}/T_{max}$ (°C) | 350 | 292 | 369 | 500  | 500  |
|            | Max. conv.(%)         | 7.8 | 100 | 100 | 77.7 | 11   |
|            | $T_{50}$ (°C)         | -   | 250 | 306 | 468  | -    |
|            | $T_{90}/T_{max}$ (°C) | 500 | 290 | 369 | 500  | 500  |
|            | Max. conv.(%)         | 4.3 | 100 | 100 | 80   | 13.7 |

*Table S1: Maximum conversion values, Light-off Temperatures ( $T_{50}$ ), Temperatures of 90% conversion in case of CO and  $C_3H_6$  and Temperatures of max conversion in case of  $C_3H_8$ ,  $CH_4$  and NO for the different tested catalysts*

## References:

- [1] G. Ertl, R. Hierl, H. Knözinger, N. Thiele, H.P. Urbach, XPS study of copper aluminate catalysts, Appl. Surf. Sci. (1980). [https://doi.org/10.1016/0378-5963\(80\)90117-8](https://doi.org/10.1016/0378-5963(80)90117-8).
- [2] F. Severino, J.L. Brito, J. Laine, J.L.G. Fierro, A.L. Agudo, Nature of Copper Active Sites in the Carbon Monoxide Oxidation on  $CuAl_2O_4$  and  $CuCr_2O_4$  Spinel Type Catalysts, J. Catal. 177 (1998) 82–95. <https://doi.org/10.1006/JCAT.1998.2094>.
- [3] H. Ham, J. Kim, S.J. Cho, J.H. Choi, D.J. Moon, J.W. Bae, Enhanced Stability of Spatially Confined Copper Nanoparticles in an Ordered Mesoporous Alumina for Dimethyl Ether Synthesis from Syngas, ACS Catal. (2016). <https://doi.org/10.1021/acscatal.6b00882>.
